# Supplementary material
Source: publisher site journal article supplement (https://www.kjim.org/upload/media/kjim-2021-186-suppl2.pdf)
Supplement: Supplementary file 1 [file kjim-2021-186-suppl2.pdf]

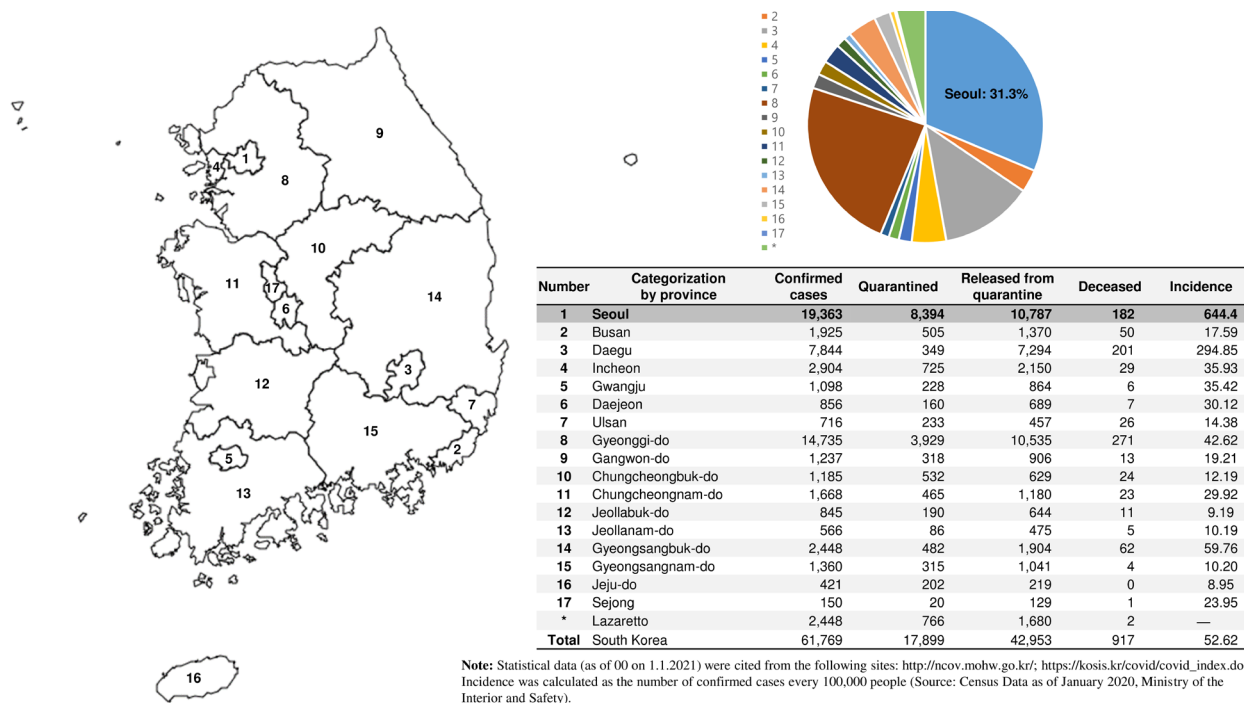

Supplementary Figure 2. The cumulative number of confirmed coronavirus disease 2019 (COVID-19) cases in South Korea [26-28].
